# THE AMERICAN PSYCHIATRIC ASSOCIATION

1000 Wilson Blvd., Suite 1825, Arlington, VA 22209-3901  
(888) 357-7924 (toll-free inside the U.S. and Canada) / (703) 907-7300  
web site: [www.psychiatry.org](http://www.psychiatry.org) • e-mail: [apa@psych.org](mailto:apa@psych.org)

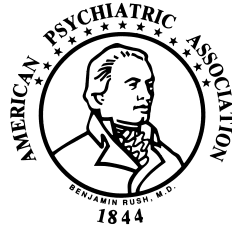

## OFFICERS 2013–2014

|                 |                            |
|-----------------|----------------------------|
| President       | Jeffrey A. Lieberman, M.D. |
| President-Elect | Paul Summergrad, M.D.      |
| Treasurer       | David Fassler, M.D.        |
| Secretary       | Maria A. Oquendo, M.D.     |

## ASSEMBLY

|               |                        |
|---------------|------------------------|
| Speaker       | Melinda L. Young, M.D. |
| Speaker-Elect | Jenny L. Boyer, M.D.   |
| Recorder      | Glenn A. Martin, M.D.  |

## MEDICAL DIRECTOR'S OFFICE

Medical Director and CEO James H. Scully, Jr., M.D.

## BOARD OF TRUSTEES

|                              |                         |                             |
|------------------------------|-------------------------|-----------------------------|
| Jeffrey Akaka, M.D.          | Jeffrey Geller, M.D.    | Phillip M. Murray, M.D.     |
| Christina J. Arredondo, M.D. | Marc David Graff, M.D.  | James E. Niningger, M.D.    |
| Carol A. Bernstein, M.D.     | James A. Greene, M.D.   | John M. Oldham, M.D.        |
| Lara J. Cox, M.D., M.S.      | Dilip V. Jeste, M.D.    | Uyen-Khanh Quang-Dang, M.D. |
| Brian Crowley, M.D.          | Judith F. Kashtan, M.D. | Gail E. Robinson, M.D.      |
| Anita S. Everett, M.D.       | Molly K. McVoy, M.D.    | Erik R. Vanderlip, M.D.     |

## PUBLISHER

Rebecca D. Rinehart

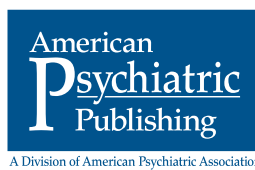

The American Journal of Psychiatry is online at [ajp.psychiatryonline.org](http://ajp.psychiatryonline.org)

THE AMERICAN PSYCHIATRIC ASSOCIATION  
Chairpersons of Councils, Commissions, Committees, and Task Forces

Standing Committees

**Bylaws**

Rebecca W. Brendel, M.D., J.D.

**Elections**

Barry K. Herman, M.D.

**Ethics**

Richard D. Milone, M.D.

**Finance and Budget**

Alan F. Schatzberg, M.D.

*Audit*

David Fassler, M.D.

*Investment Oversight*

Larry R. Faulkner, M.D.

**Joint Reference**

Paul Summergrad, M.D.

**Membership**

Jonathan M. Amiel, M.D.

**Nominating**

Dilip V. Jeste, M.D.

**Tellers**

Hind Benjelloun, M.D.

**Council on Addiction Psychiatry**

Frances R. Levin, M.D.

**Council on Advocacy and Government Relations**

Robert Paul Cabaj, M.D.

*Advocacy and Litigation Funding*

Renee L. Binder, M.D.

**Council on Children, Adolescents, and Their Families**

Louis J. Kraus, M.D.

*Agnes Purcell McGavin Award*

*Blanche F. Ittleson Research Award*

Matthew W. State, M.D.

**Council on Communications**

Jeffrey A. Borenstein, M.D.

**Council on Geriatric Psychiatry**

Robert P. Roca, M.D.

**Council on Healthcare Systems and Financing**

Howard H. Goldman, M.D.

*Reimbursement for Psychiatric Care*

Bruce J. Schwartz, M.D.

*RBRVS, Codes and Reimbursement*

Ronald M. Burd, M.D.

**Council on Medical Education and Lifelong Learning**

Richard F. Summers, M.D.

*APA Public Psychiatry Fellowship Selection Committee*

Christina V. Mangurian, M.D.

*APA/SAMHSA Minority Fellowship Selection and Advisory*

Altha J. Stewart, M.D.

*Scientific Program*

Philip R. Muskin, M.D.

*Scientific Program Committee of the Institute on Psychiatric Services*

Altha J. Stewart, M.D.

*Task Force to Update the Ethics Annotations*

Laura W. Roberts, M.D.

*Vestermark Award Committee*

Joel Yager, M.D.

**Council on Minority Health and Health Disparities**

Sandra C. Walker, M.D.

**Council on Psychiatry And Law**

Steven K. Hoge, M.D.

*Isaac Ray/Human Rights Award*

Steven K. Hoge, M.D.

*Judicial Action*

Paul S. Appelbaum, M.D.

*Manfred S. Guttmacher Award*

David A. Lowenthal, M.D.

**Council on Psychosomatic Medicine  
(Consultation Liaison Psychiatry)**

Joel E. Dimsdale, M.D.

**Council on Quality Care**

Joel Yager, M.D.

*Electronic Health Records*

Steven Roy Daviss, M.D.

*Steering Committee on Practice Guidelines*

Michael J. Vergare, M.D.

**Council on Research**

Dwight L. Evans, M.D.

*Psychiatric Dimensions of Disasters*

Charles R. Marmar, M.D.

*Research Awards*

Timothy B. Walsh, M.D.

*Task Force to Revise the Practice of Electroconvulsive Therapy*

Sarah H. Lisanby, M.D.

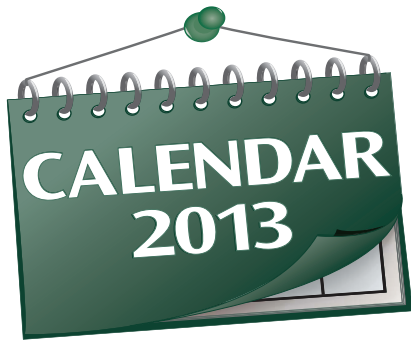

*For free listing of your organization's official annual or regional meeting, please send us the following information: sponsor, location, inclusive dates, type and number of continuing education credits (if available), and the name, address, and telephone number of the person or group to contact for more information. In order for an event to appear in our listing, all notices and changes must be received at least 6 months in advance of the meeting and should be addressed to:*

*Calendar, American Journal of Psychiatry, 1000 Wilson Boulevard, Suite 1825, Arlington, VA 22209-3901, [swestrate@psych.org](mailto:swestrate@psych.org) (e-mail).*

*Because of space limitations, only listings of meetings of the greatest interest to Journal readers may be included.*

---

## SEPTEMBER

**September 19–22**, North Carolina Psychiatric Association conference "Side Effects: Adherence, Tolerability and Insight in Psychiatric Treatment," Asheville, N.C. Contact: 919-859-3370 (tel); [info@ncpsychiatry.org](mailto:info@ncpsychiatry.org) (email); [www.ncpsychiatry.org/annual-meeting-scientific-session](http://www.ncpsychiatry.org/annual-meeting-scientific-session) (web site).

**September 25–27**, 9th Congress of the International Neuropsychiatric Association, Chicago, Ill. [www.inawebsite.org](http://www.inawebsite.org) (web site).

---

## OCTOBER

**October 10–13**, 65th Institute on Psychiatric Services, Philadelphia, Pa. Contact: APA Annual Meetings Dept., 1000 Wilson Blvd, Suite 1825, Arlington, VA 22209; <http://www.psychiatry.org/learn/institute-on-psychiatric-services> (web site).

[www.psychiatry.org/learn/institute-on-psychiatric-services](http://www.psychiatry.org/learn/institute-on-psychiatric-services) (web site).

**October 16–19**, annual meeting of the Association for Academic Psychiatry, Charleston, S.C. [www.academicpsychiatry.org](http://www.academicpsychiatry.org) (web site).

**October 17–21**, XXI World Congress of Psychiatric Genetics, Boston, Mass. Contact congress organizer: Parthenon Management Group, 5034A Thoroughbred Lane, Brentwood, TN 37027; (615) 324-2365 (tel); [info@parthenonmanagementgroup.com](mailto:info@parthenonmanagementgroup.com) (email); [www.wcpg2013.org](http://www.wcpg2013.org) (web site).

---

## FEBRUARY 2014

**February 16–20**, 25th Annual Meeting of the American Neuropsychiatric Association, Seattle, Wash. [www.anpaonline.org](http://www.anpaonline.org) (web site).

---

## MARCH 2014

**March 12–15**, 43rd Annual Meeting of the American Association of Directors of Psychiatric Residency Training, Tucson, Ariz. [www.aadprt.org](http://www.aadprt.org) (web site).

---

## MAY 2014

**May 3–7**, 167th Annual Meeting, American Psychiatric Association, New York, NY. Contact: APA Annual Meetings Dept., 1000 Wilson Blvd, Suite 1825, Arlington, VA 22209; (703) 907-7815 (tel); <http://www.psych.org/learn/annual-meeting> (web site).

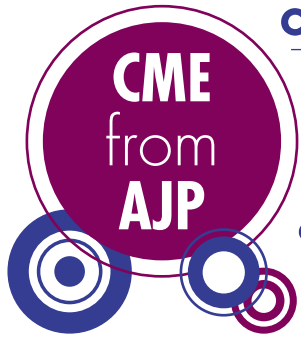

## Continuing Medical Education

Three articles in this issue form the basis of a short course with questions that can be answered for up to 1 *AMA PRA Category 1 Credit*<sup>™</sup> each by visiting <http://psychiatryonline.org/cme.aspx> and clicking on the “American Journal of Psychiatry” tab.

CME credit is issued only online, and a paid subscription to the AJP CME course program is required.

This month’s courses appear on pages 1075–1078.

FREE AUDIO!

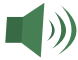

### Have You Heard?

You can listen to highlights of *The American Journal of Psychiatry* by downloading a monthly free .mp3 audio file from our web site (<http://ajp.psychiatryonline.org/audio.aspx#>) or by subscribing to the AJP Audio podcast at iTunes or other feed reader. Presented by Deputy Editor Dr. Susan Schultz or by Executive Editor Michael Roy, each month’s audio lasts approximately 30 minutes and covers several research articles, the Treatment in Psychiatry feature, and one or two editorials.

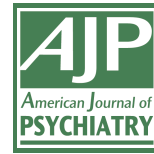

Coming in the October 2013 issue\*

## THE AMERICAN JOURNAL OF PSYCHIATRY

### Antidepressant Efficacy of Ketamine in Treatment-Resistant Major Depression: A Two-Site Randomized Controlled Trial

J.W. Murrough, D.V. Iosifescu, L.C. Chang, R.K. Al Jurdi, C.M. Green, A.M. Perez, S. Iqbal,  
S. Pillemer, A. Foulkes, A. Shah, D.S. Charney, and S.J. Mathew

### Altered Insula Response to Sweet Taste Processing After Recovery From Anorexia and Bulimia Nervosa

T.A. Oberndorfer, G.K.W. Frank, A.N. Simmons, A. Wagner, D. McCurdy, J.L. Fudge,  
T.T. Yang, M.P. Paulus, and W.H. Kaye

### Impact of Maternal Depression Across the First 6 Years of Life on the Child’s Mental Health, Social Engagement, and Empathy: The Moderating Role of Oxytocin

Y. Apter-Levy, M. Feldman, A. Vakart, R.P. Ebstein, and R. Feldman

### Neural Mechanisms of Frustration in Chronically Irritable Children

C.M. Deveney, M.E. Connolly, C.T. Haring, B.L. Bones, R.C. Reynolds,  
P. Kim, D.S. Pine, and E. Leibenluft

\*Can’t wait? Visit [ajp.psychiatryonline.org/AJPinAdvance.aspx](http://ajp.psychiatryonline.org/AJPinAdvance.aspx) to see all articles uploaded in advance of print!

# The Residents' JOURNAL

The Residents' JOURNAL

a publication of  
The American Journal of Psychiatry

July 2013

Volume 8

Issue 7

## Inside

- 2 From Strength to Strength  
Arshya Vahabzadeh, M.D.
- 3 Beyond Collaboration:  
The Psychiatrist and the  
Medical Home  
Brian E. McKinney, M.D.
- 6 Globus in the Elderly  
Kristina Zdanys, M.D.
- 9 Interdisciplinary Treatment of  
Dementia With Associated  
Behavioral Disturbances  
Tamela D. McClam, M.D.
- 11 A Serious Suicide Attempt in  
An Elderly Woman  
Kristopher Keith Klem, B.A.,  
David Chih-dah Hsu, M.D.
- 13 The Standard of Care in  
Suicide Risk Assessment:  
A Review for Psychiatry  
Residents  
Dimitrios Tsatisis, M.D.
- 15 Rethinking Our Approach:  
A Cry Against Gun Violence  
Lama Bazzi, M.D.
- 18 Author Information for  
The Residents' Journal  
Submissions
- 18 Upcoming Issue Themes

## In This Issue

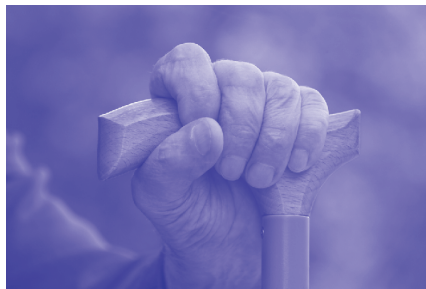

This month's issue of the *Residents' Journal* features a section theme on geriatric psychiatry. The section begins with an article by Brian E. McKinney, M.D., on psychiatrists' role in collaborative and integrated care models, particularly with regard to geriatric populations. Kristina Zdanys, M.D., provides a review of globus in the elderly. Tamela D. McClam, M.D., presents a case report of dementia with associated behavioral disturbances in an elderly patient. Last, Kristopher Keith Klem, B.A., and David Chih-dah Hsu, M.D., present a case report of a serious suicide attempt in a 75-year-old woman.

Editor-in-Chief  
Arshya Vahabzadeh, M.D.  
Deputy Editor  
Misty Richards, M.D., M.S.  
Associate Editor  
David Hsu, M.D.  
Guest Section Editor  
David Hsu, M.D.

Editors Emeriti  
Sarah B. Johnson, M.D.  
Molly McVoy, M.D.  
Joseph M. Cerimele, M.D.  
Sarah M. Fayad, M.D.  
Monifa Seawell, M.D.  
Staff Editor  
Angela Moore

*The Residents' Journal* accepts manuscripts authored by medical students, resident physicians, and fellows. To submit your paper, please visit the manuscript submission site at [mc.manuscriptcentral.com/appi-ajp](http://mc.manuscriptcentral.com/appi-ajp) and either create an account or use your existing account. For manuscript type, select "Residents." Then follow the instructions to upload your manuscript. Residents who are interested in participating as Guest Section Editors should e-mail *The Residents' Journal* Editor-in-Chief Monifa Seawell at [mseawell@med.wayne.edu](mailto:mseawell@med.wayne.edu).

*The Residents' Journal* is sent free-of-charge to all psychiatry residents. Anyone interested in being included on the distribution list should contact Angela Moore, *The Residents' Journal* staff editor at [ajp@psych.org](mailto:ajp@psych.org) with "Subscribe to Residents' Journal" in the subject line.

To access the complete Residents' Journal archives, visit [ajp.psychiatryonline.org/residents\\_journal.aspx](http://ajp.psychiatryonline.org/residents_journal.aspx)

# Contents

- A5 Editorial Board  
A7 Highlights of this issue

## Editorials

- 81 **Attention-deficit hyperactivity disorder and the shifting sands of psychiatric nosology**  
S. V. Faraone
- 83 **King George III: re-evaluation of his mental health issues – extra**  
Timothy Peters
- 84 **ENCODE and a new landscape for psychiatric genetics**  
A. Nair and R. Howard
- 86 **Collaborative care at the crossroads**  
P. Roy-Byrne
- 88 **How can the service user voice be best heard at psychiatric meetings?**  
T. Burns and D. Rose

## Review article

- 90 **Adjusted prognostic association of depression following myocardial infarction with mortality and cardiovascular events: individual patient data meta-analysis**  
A. Meijer, H. J. Conradi, E. H. Bos, M. Anselmino, R. M. Carney, J. Denollet, F. Doyle, K. E. Freedland, S. L. Grace, S. H. Hosseini, D. A. Lane, L. Pilote, K. Parakh, C. Rafanelli, H. Sato, R. P. Steeds, C. Welin and P. de Jonge

- 102 **On Jaspers' *General Psychopathology* – reflection**  
Matthew R. Broome

## Papers

- 103 **Risk of bipolar disorder and schizophrenia in relatives of people with attention-deficit hyperactivity disorder**  
H. Larsson, E. Rydén, M. Boman, N. Långström, P. Lichtenstein and M. Landén
- 107 **Shared polygenic contribution between childhood attention-deficit hyperactivity disorder and adult schizophrenia**  
M. L. Hamshere, E. Stergiakouli, K. Langley, J. Martin, P. Holmans, L. Kent, M. J. Owen, M. Gill, A. Thapar, M. O'Donovan and N. Craddock
- 112 **Stimulant treatment for attention-deficit hyperactivity disorder and risk of developing substance use disorder**  
A. P. Groenman, J. Oosterlaan, N. N. J. Rommelse, B. Franke, C. U. Greven, P. J. Hoekstra, C. A. Hartman, M. Luman, H. Roeyers, R. D. Oades, J. A. Sergeant, J. K. Buitelaar and S. V. Faraone
- 119 **Military psychiatry – in 100 words**  
Martin P. Deahl
- 120 **Combined impact of smoking and heavy alcohol use on cognitive decline in early old age: Whitehall II prospective cohort study**  
G. Hagger-Johnson, S. Sabia, E. J. Brunner, M. Shipley, M. Bobak, M. Marmot, M. Kivimaki and A. Singh-Manoux

- 126 **Effectiveness of the Mindfulness in Schools Programme: non-randomised controlled feasibility study**  
W. Kuyken, K. Weare, O. C. Ukoumunne, R. Vicary, N. Motton, R. Burnett, C. Cullen, S. Hennelly and F. Huppert

- 132 **Collaborative stepped care v. care as usual for common mental disorders: 8-month, cluster randomised controlled trial**  
D. B. Oosterbaan, M. J. P. M. Verbraak, B. Terluin, A. W. Hoogendoorn, W. J. Peyrot, A. Muntingh and A. J. L. M. van Balkom

- 140 **Impact of cognitive therapy on internalised stigma in people with at-risk mental states**  
A. P. Morrison, M. Birchwood, M. Pyle, C. Flach, S. L. K. Stewart, R. Byrne, P. Patterson, P. B. Jones, D. Fowler, A. I. Gumley and P. French

- 145 **Inanimate mechanical forces – poems by doctors**  
Allan Seppänen

- 146 **Attitudes towards psychiatric treatment and people with mental illness: changes over two decades**  
M. C. Angermeyer, H. Matschinger and G. Schomerus

## Short report

- 152 **Cavum septum pellucidum and psychopathy**  
P. Toivonen, M. Könönen, E. Niskanen, O. Vaurio, E. Repo-Tiihonen, A. Seppänen, H. J. Aronen, R. Vanninen, J. Tiihonen and M. P. Laakso

## Columns

- 154 **Correspondence**  
156 **Book reviews**  
158 **Contents of *Advances in Psychiatric Treatment***  
159 **Contents of the *American Journal of Psychiatry***  
160 **From the Editor's desk**

## Cover picture

*The Arising of Methuselah's Palace* (2012). Anthony Woods-McLean (b. 1934)

Anthony Woods-McLean is a digital artist and graphic designer working in Dulwich, south London.

Most of his employed life was spent on Fleet Street newspapers, beginning as a copytaker, with experience on all the national daily papers, until new technology arrived and he crossed over into subediting and electronic page design on the *Sunday Times*.

Then, after a disastrous episode of depression, he left the newspaper industry and became an independent digital artist, photographer and graphic designer.

His remarkable recovery brought with it a creative explosion (he has produced over 2500 works in the past 8 years). Ironically, some of those who treated him in the Maudsley Hospital later employed him to design art show posters and publicity material, as well as inviting him to exhibit his own work. He also creates portraits, and photographs archival records for other artists (see [www.woods-macgallery.co.uk](http://www.woods-macgallery.co.uk)).

*The Arising of Methuselah's Palace* is a mythological fantasy reminiscent of the splendour and impact of a palace befitting the oldest man on earth, as he was known.

We are always looking for interesting and visually appealing images for the cover of the *Journal* and would welcome suggestions or pictures, which should be sent to Dr Allan Beveridge, British Journal of Psychiatry, 17 Belgrave Square, London SW1X 8PG, UK or [bjp@rcpsych.ac.uk](mailto:bjp@rcpsych.ac.uk).

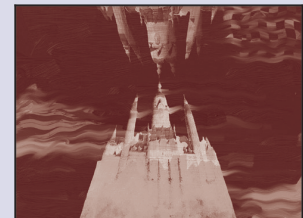

Source: http://ajp.psychiatryonline.org/doi/suppl/10.1176/ajp.2013.170.issue-9/suppl_file/front.pdf
