# THE AMERICAN JOURNAL OF PSYCHIATRY

---

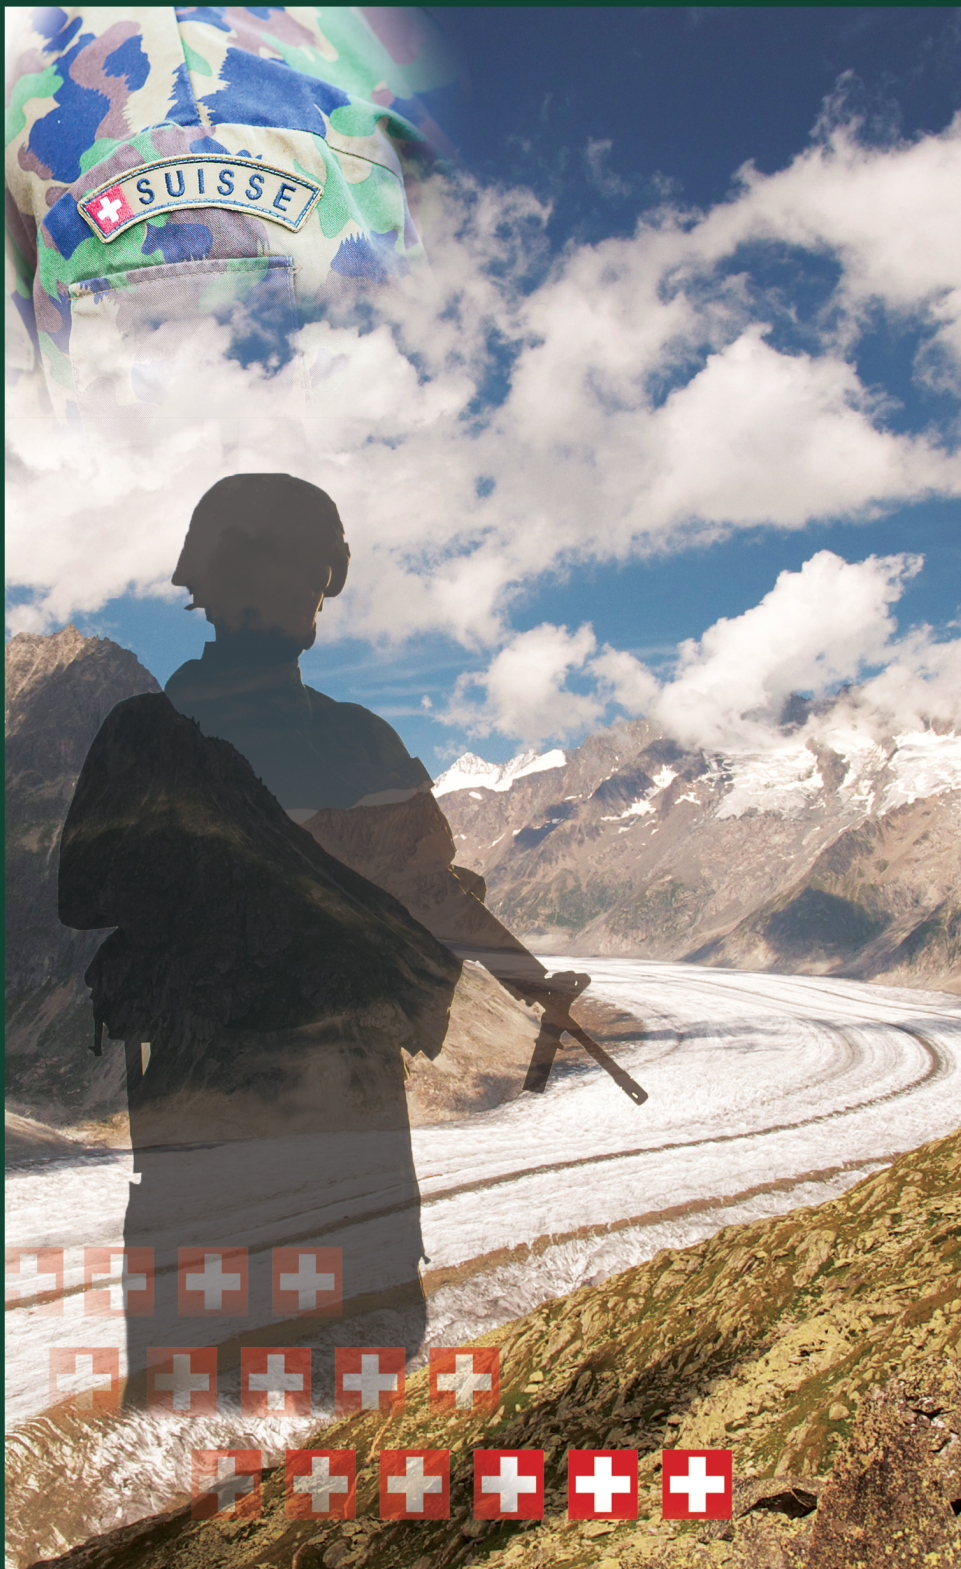

- ◀ **Change in Suicide Rates in Switzerland Before and After Firearm Restriction Resulting From the 2003 “Army XXI” Reform**  
Thomas Reisch, M.D., et al. 951
- Gang Membership, Violence, and Psychiatric Morbidity**  
Jeremy W. Coid, M.D., et al. 962
- A Trial of Prazosin for Combat Trauma PTSD With Nightmares in Active-Duty Soldiers Returned From Iraq and Afghanistan**  
Murray A. Raskind, M.D., et al. 973
- The Long-Term Effects of Conventional and Atypical Antipsychotics in Patients With Probable Alzheimer’s Disease**  
Oscar L. Lopez, M.D., et al. 984

**September 2013**  
**Volume 170 • Number 9**

---

Official Journal of the  
AMERICAN PSYCHIATRIC ASSOCIATION

---

[ajp.psychiatryonline.org](http://ajp.psychiatryonline.org)
